# Supplementary material
Source: PubMed Central journal article supplement (PMC5084075)
Supplement: oc6b00086_si_012.pdf [file oc6b00086_si_012.pdf]

## Mat Todd / Sydney / October 2012: Batch 1

Screening of batch one compounds performed by Dr Sabine Mangold (Avery lab):

| OSM NUMBER | INTERNAL/BATCH REFERENCE |
|------------|--------------------------|
| OSM-S-56   | JRC 12-6                 |
| OSM-S-57   | PMY 50-1                 |
| OSM-S-58   | PMY 38-5-B               |
| OSM-S-59   | PMY 55-1                 |
| OSM-S-60   | PMY 56-1                 |
| OSM-S-61   | PMY 57-1                 |
| OSM-S-62   | PMY 58-1                 |
| OSM-S-64   | JRC 17-1                 |
| OSM-S-65   | JRC 20-3                 |
| OSM-S-66   | JRC 6-5                  |
| OSM-S-67   | JRC 10-5                 |
| OSM-S-68   | MD 5-1                   |
| OSM-S-69   | JRC 15-3                 |
| OSM-S-70   | JRC 13-3                 |
| OSM-S-71   | JRC 14-5                 |

All compounds were screened in duplicate in IC<sub>50</sub> format against 3D7 parasites (Figure 1).

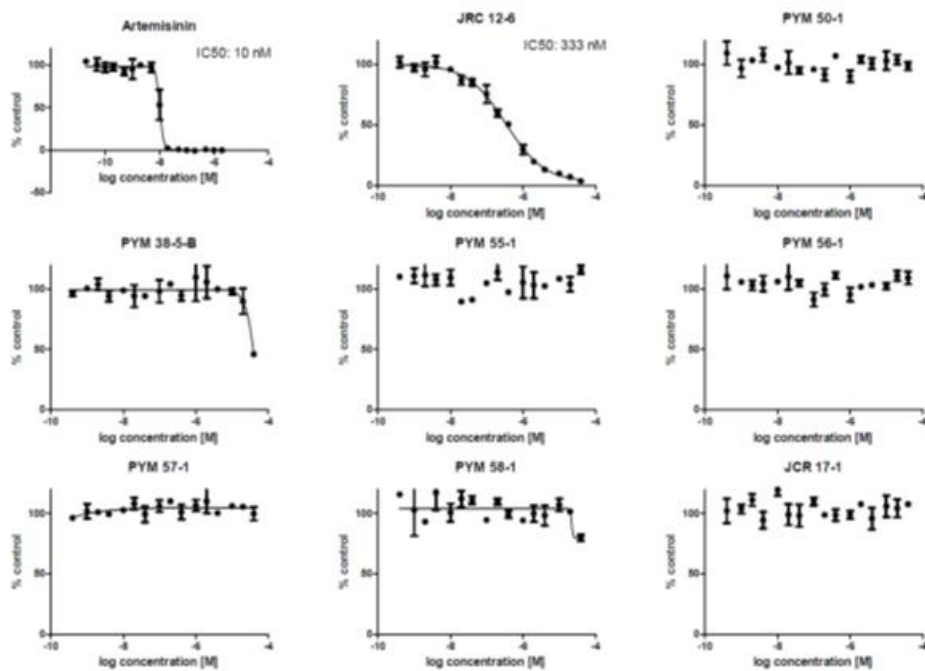

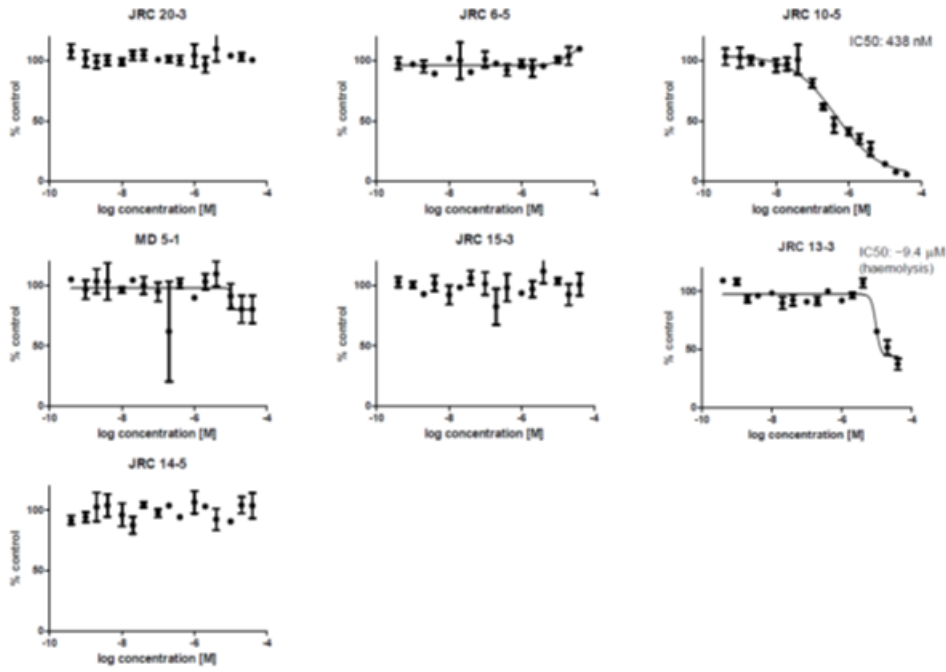

Active molecules were also tested for cytotoxicity against HEK 293 cells (Figure 2).

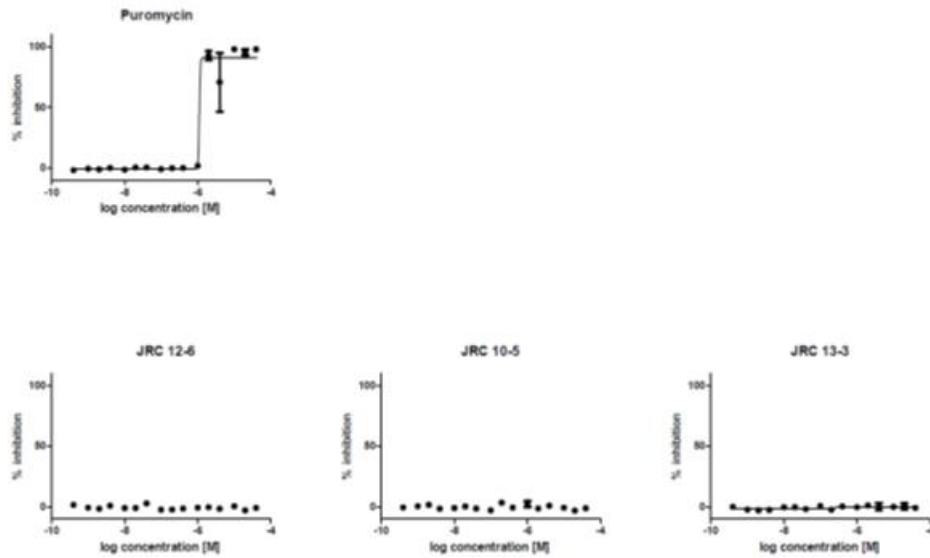

Testing of different batches of Alamar Blue and Resazurin gave additional cytotoxicity data (Figure 3).

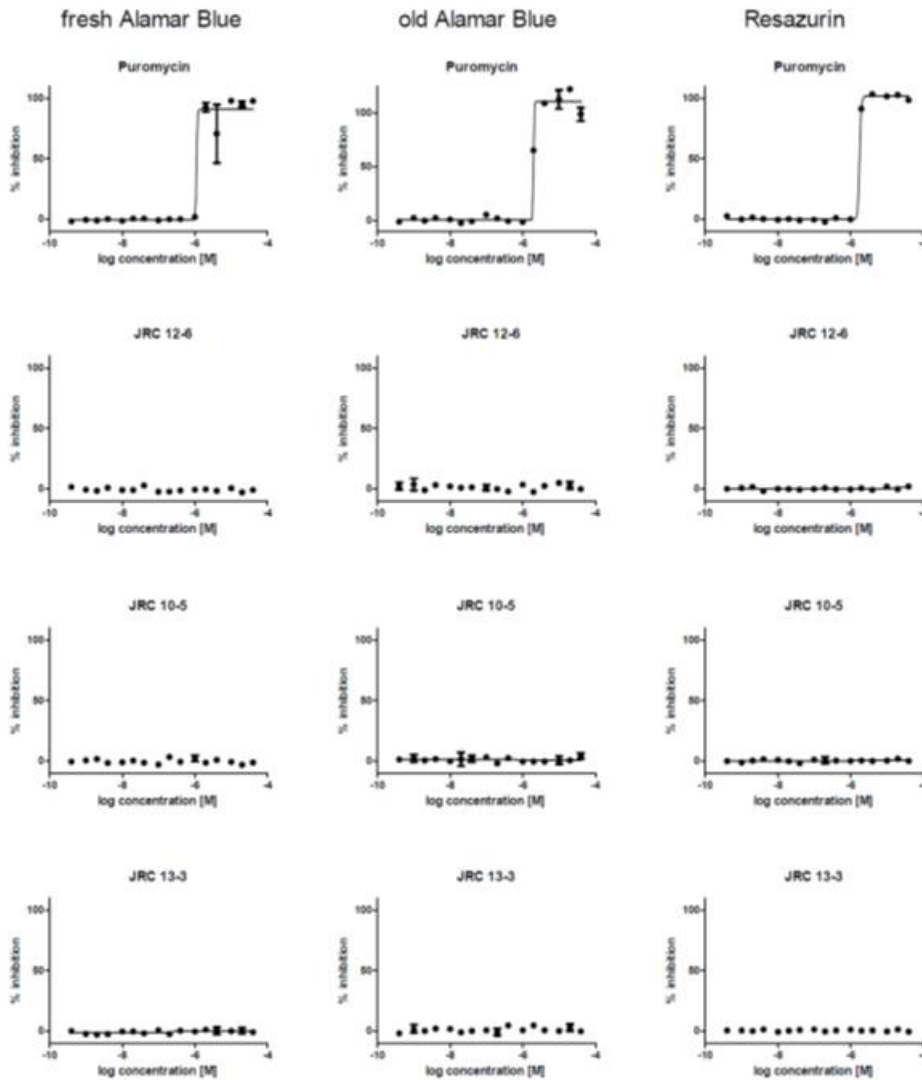

**Conclusion:**

Two compounds showed activity in the nM range, with a third exhibiting  $\mu$ M and noticeable haemolysis. Compounds were tested for general cytotoxicity, and all clearly were not cytotoxic. Additional replicas were generated as different batches of Alamar Blue and Resazurin were being tested.

JRC 12-6: IC<sub>50</sub> value 333nM; JRC 10-5: IC<sub>50</sub> value 438nM; JRC 13-3: 9.4 $\mu$ M (Haemolysis)

Malaria asexual screening reference: Artemisinin IC<sub>50</sub> value 10nM

Puromycin used as control for 100% cytotoxicity.
