# Supplementary material
Source: PubMed Central journal article supplement (PMC5084075)
Supplement: oc6b00086_si_018.pdf [file oc6b00086_si_018.pdf]

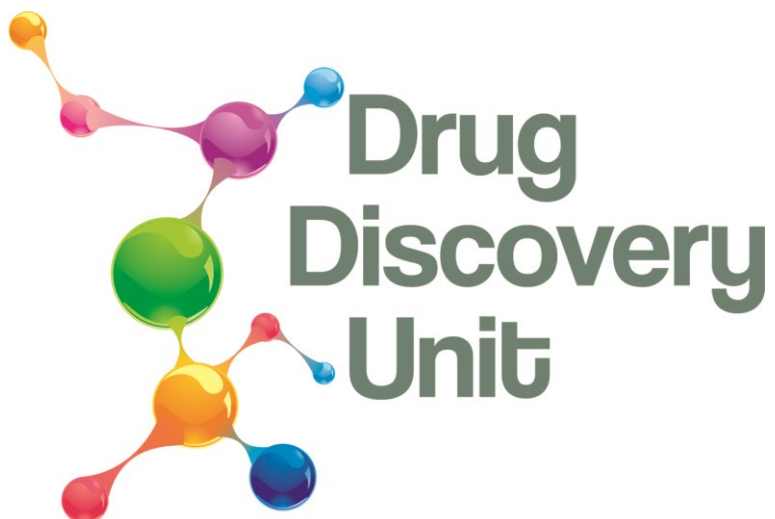

*Plasmodium falciparum* potency Assessment of 3 potential anti-malaria compounds

For Patrick Thomson, University of Edinburgh

May 2013

Irene Hallyburton

[i.hallyburton@dundee.ac.uk](mailto:i.hallyburton@dundee.ac.uk)

01382 388700

## Basic Experimental Protocol

- Cell Line: *Plasmodium falciparum* 3D7
- Media: RPMI 1640, +Albumax II
- 250nl of all test compounds, and 100% inhibition control (10mM Mefloquine), are added to assay plate using Labcyte Echo.
- 50ul of Plasmodium culture is added to each well on plate at 0.5% Parasitemia, 5% Hematocrit using Matrix Wellmate.
- Incubate at 37°C / 1% O<sub>2</sub>, 3% CO<sub>2</sub>, balance N<sub>2</sub> for 72 hours.
- Add 10µl of Sybrgreen in lysis buffer to each well on the assay plate and incubate at room temperature overnight in the absence of light.
- Read plates at excitation 485nm, emission 528nm

% Inhibition for each test compound is calculated using the following equation:

$$\% \text{ Inhibition} = 100 - \left( \frac{\text{TEST COMPOUND} - \text{BLANK}}{\text{NO INHIBITION} - \text{BLANK}} \right) * 100$$

EC50 values are calculated using IDBS Activity Base XLFit version Model 205

Each compound was run in singlicate with standard compound curve (mefloquine) on each plate.

## Data Summary

| Compound | EC50 (uM) |
|----------|-----------|
| OSM-E-1  | >50       |
| OSM-E-2  | >50       |
| OSM-E-3  | >50       |

## Compound Curves

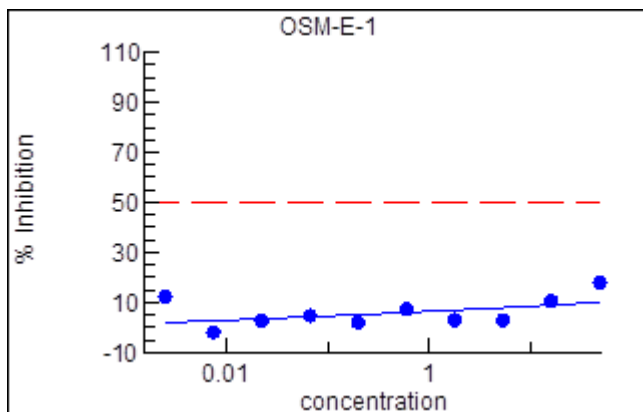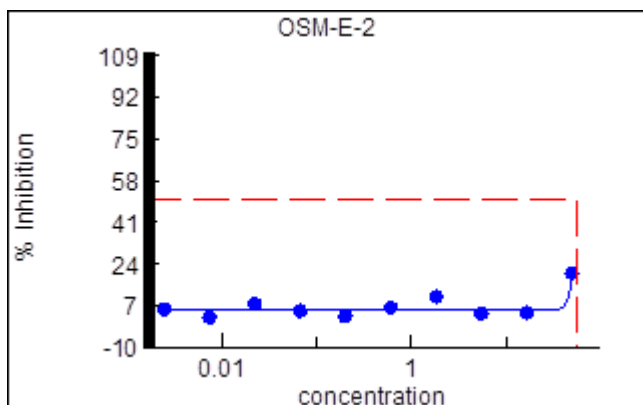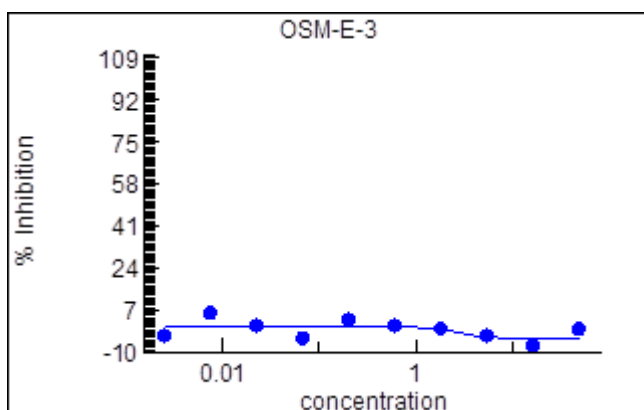

### Assay performance and Plate statistics

| Plate | Av 0% Inhib. | stdev  | Av 100% Inhib. | stdev | S:B  | Z'   |
|-------|--------------|--------|----------------|-------|------|------|
| 60637 | 2933.47      | 118.68 | 852.44         | 36.14 | 3.47 | 0.88 |
|       |              |        |                |       |      |      |

### Standard Compound

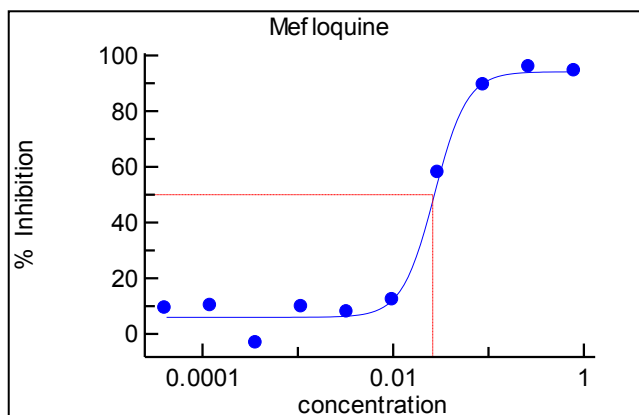

Mefloquine EC50

Plate 60537 – 25.9nm
