# Supplementary material
Source: PubMed Central journal article supplement (PMC5084075)
Supplement: oc6b00086_si_019.pdf [file oc6b00086_si_019.pdf]

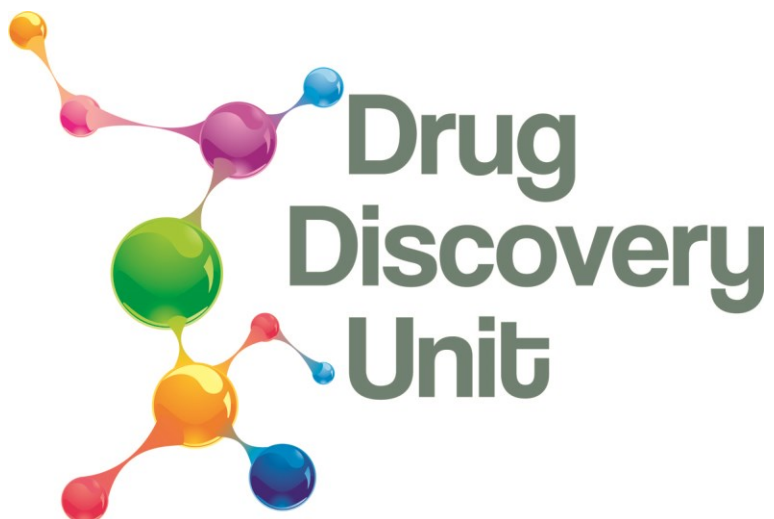

*Plasmodium falciparum* potency Assessment of 5 potential anti-malaria compounds

For Patrick Thomson, University of Edinburgh

July 2013

Irene Hallyburton

[i.hallyburton@dundee.ac.uk](mailto:i.hallyburton@dundee.ac.uk)

01382 388700

## Basic Experimental Protocol

- Cell Line: *Plasmodium falciparum* 3D7
- Media: RPMI 1640, +Albumax II
- 250nl of all test compounds, and 100% inhibition control (10mM Mefloquine), are added to assay plate using Labcyte Echo.
- 50ul of Plasmodium culture is added to each well on plate at 0.5% Parasitemia, 5% Hematocrit using Matrix Wellmate.
- Incubate at 37°C / 1% O<sub>2</sub>, 3% CO<sub>2</sub>, balance N<sub>2</sub> for 72 hours.
- Add 10µl of Sybrgreen in lysis buffer to each well on the assay plate and incubate at room temperature overnight in the absence of light.
- Read plates at excitation 485nm, emission 528nm

% Inhibition for each test compound is calculated using the following equation:

$$\% \text{ Inhibition} = 100 - \left( \frac{\text{TEST COMPOUND} - \text{BLANK}}{\text{NO INHIBITION} - \text{BLANK}} \right) * 100$$

EC50 values are calculated using IDBS Activity Base XLFit version Model 205

Each compound was run in singlicate with standard compound curve (mefloquine) on each plate.

## Data Summary

| Compound | EC50 (uM) |
|----------|-----------|
| OSM-E-4  | >50       |
| OSM-E-5  | >50       |
| OSM-E-6  | >50       |
| OSM-E-7  | >50       |
| OSM-E-8  | >50       |

## Compound Curves

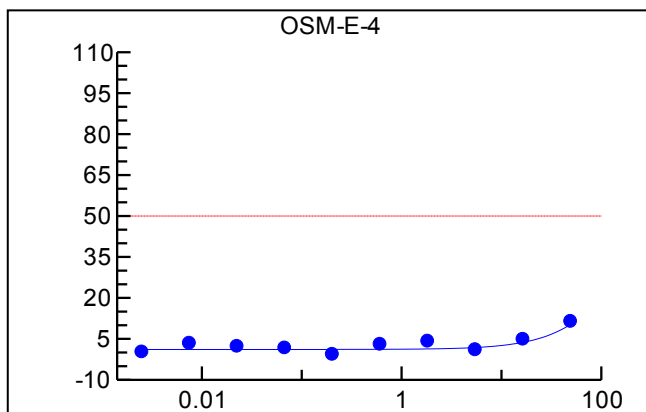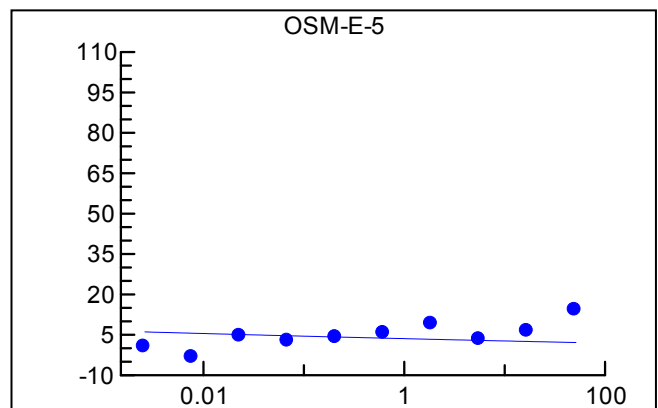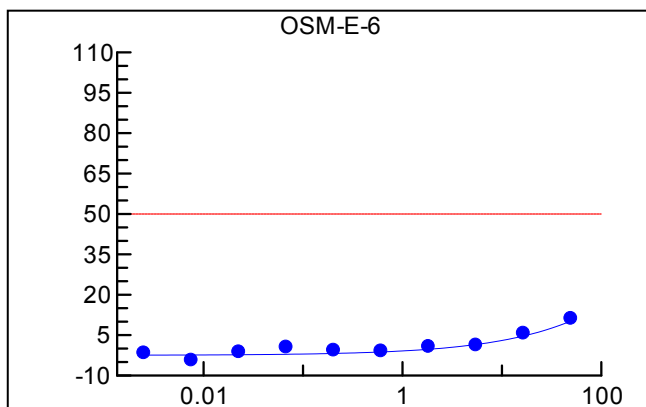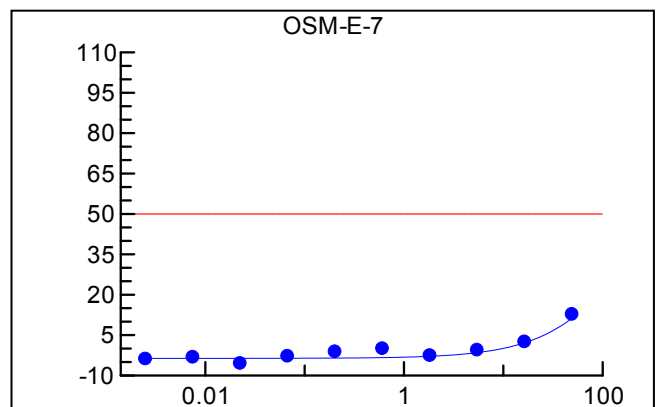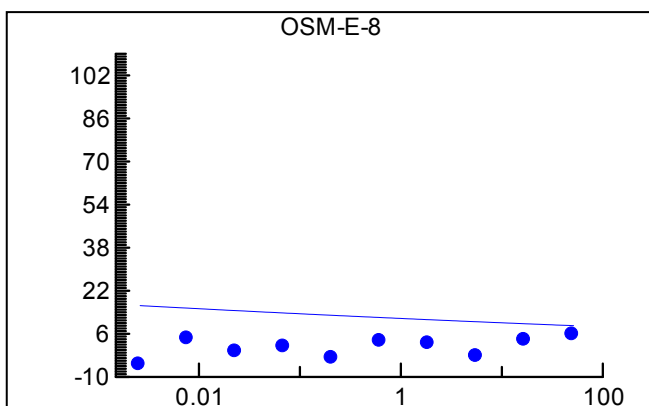

### Assay performance and Plate statistics

| Plate | Av 0% Inhib. | stdev  | Av 100% Inhib. | stdev | S:B   | Z'   |
|-------|--------------|--------|----------------|-------|-------|------|
| 62288 | 4356.813     | 153.41 | 748.22         | 43.41 | 5.823 | 0.84 |
|       |              |        |                |       |       |      |

### Standard Compound

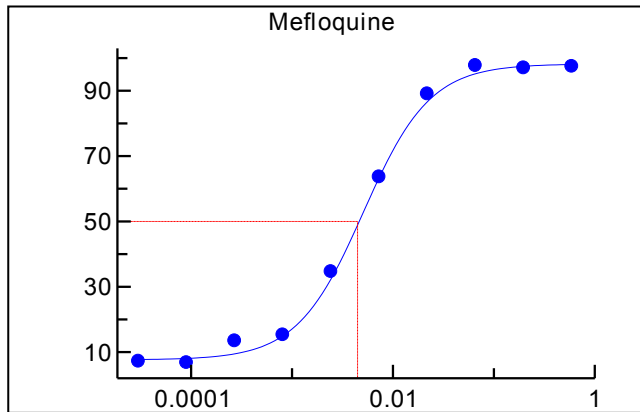

Mefloquine EC50  
Plate 62288 – 44.56nm
