# Supplementary material
Source: PubMed Central journal article supplement (PMC5084075)

OSM5\_1mk

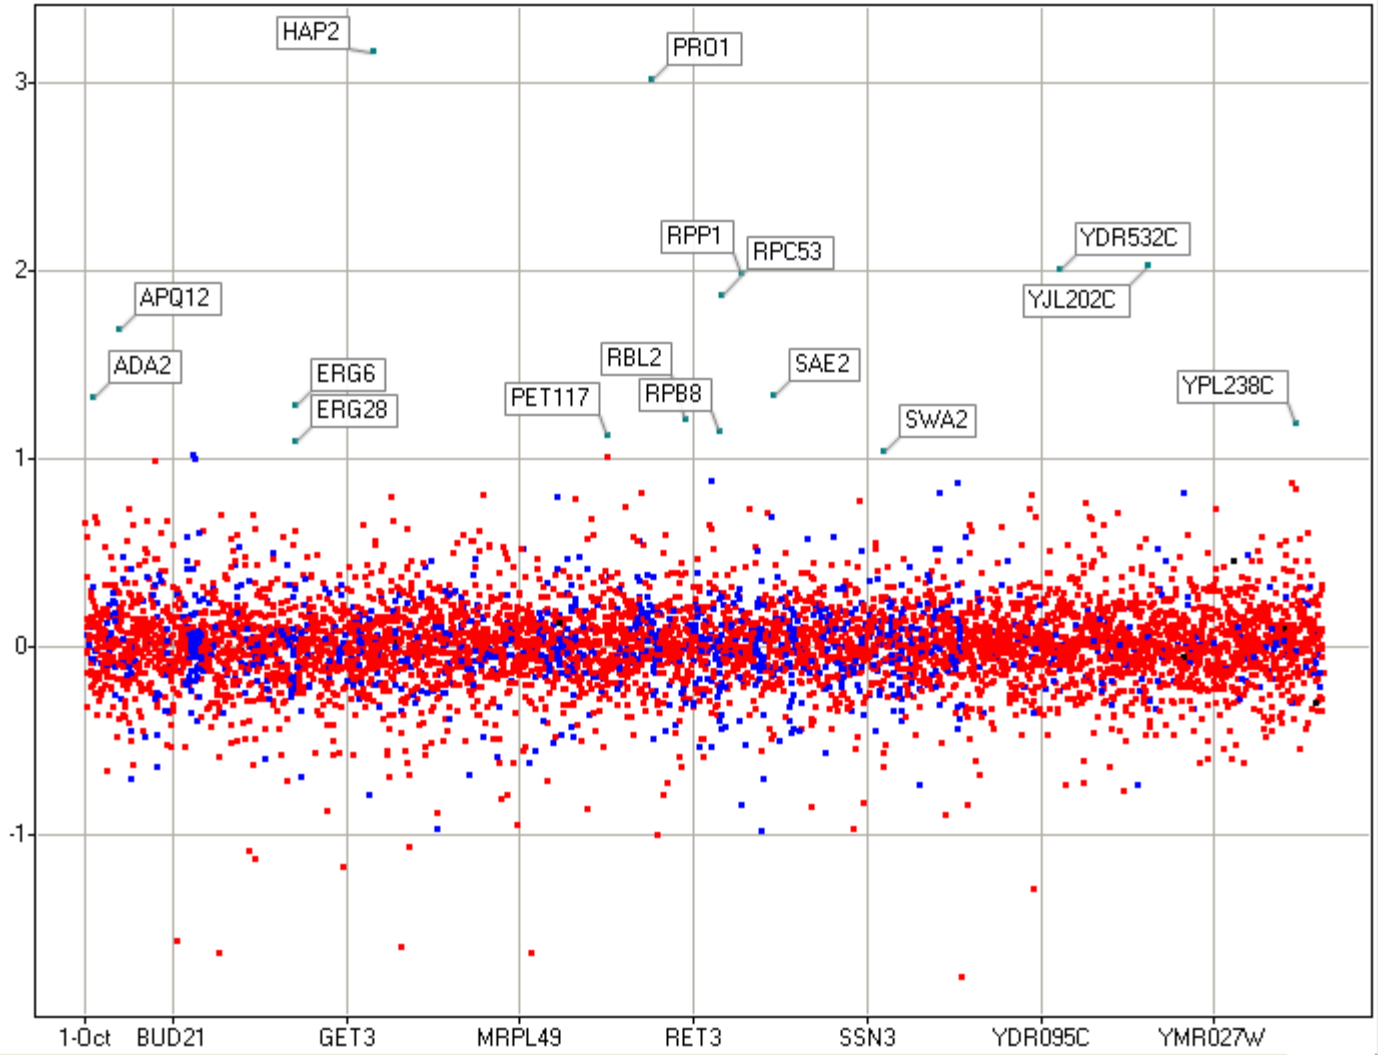

gene

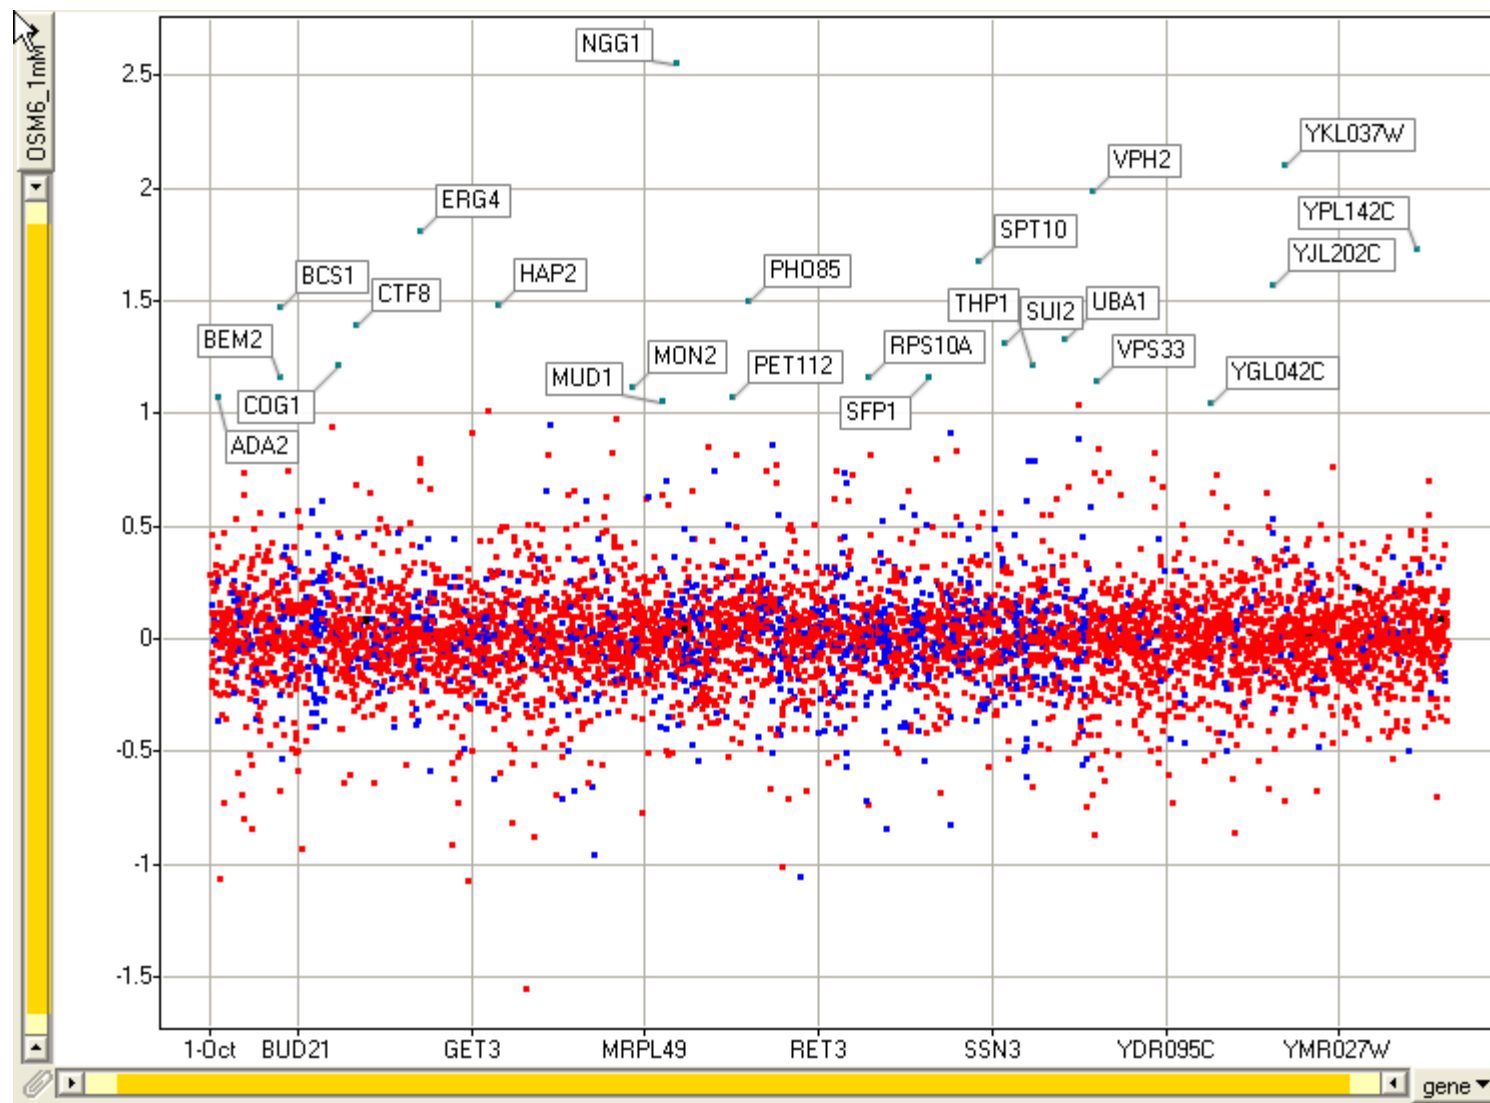

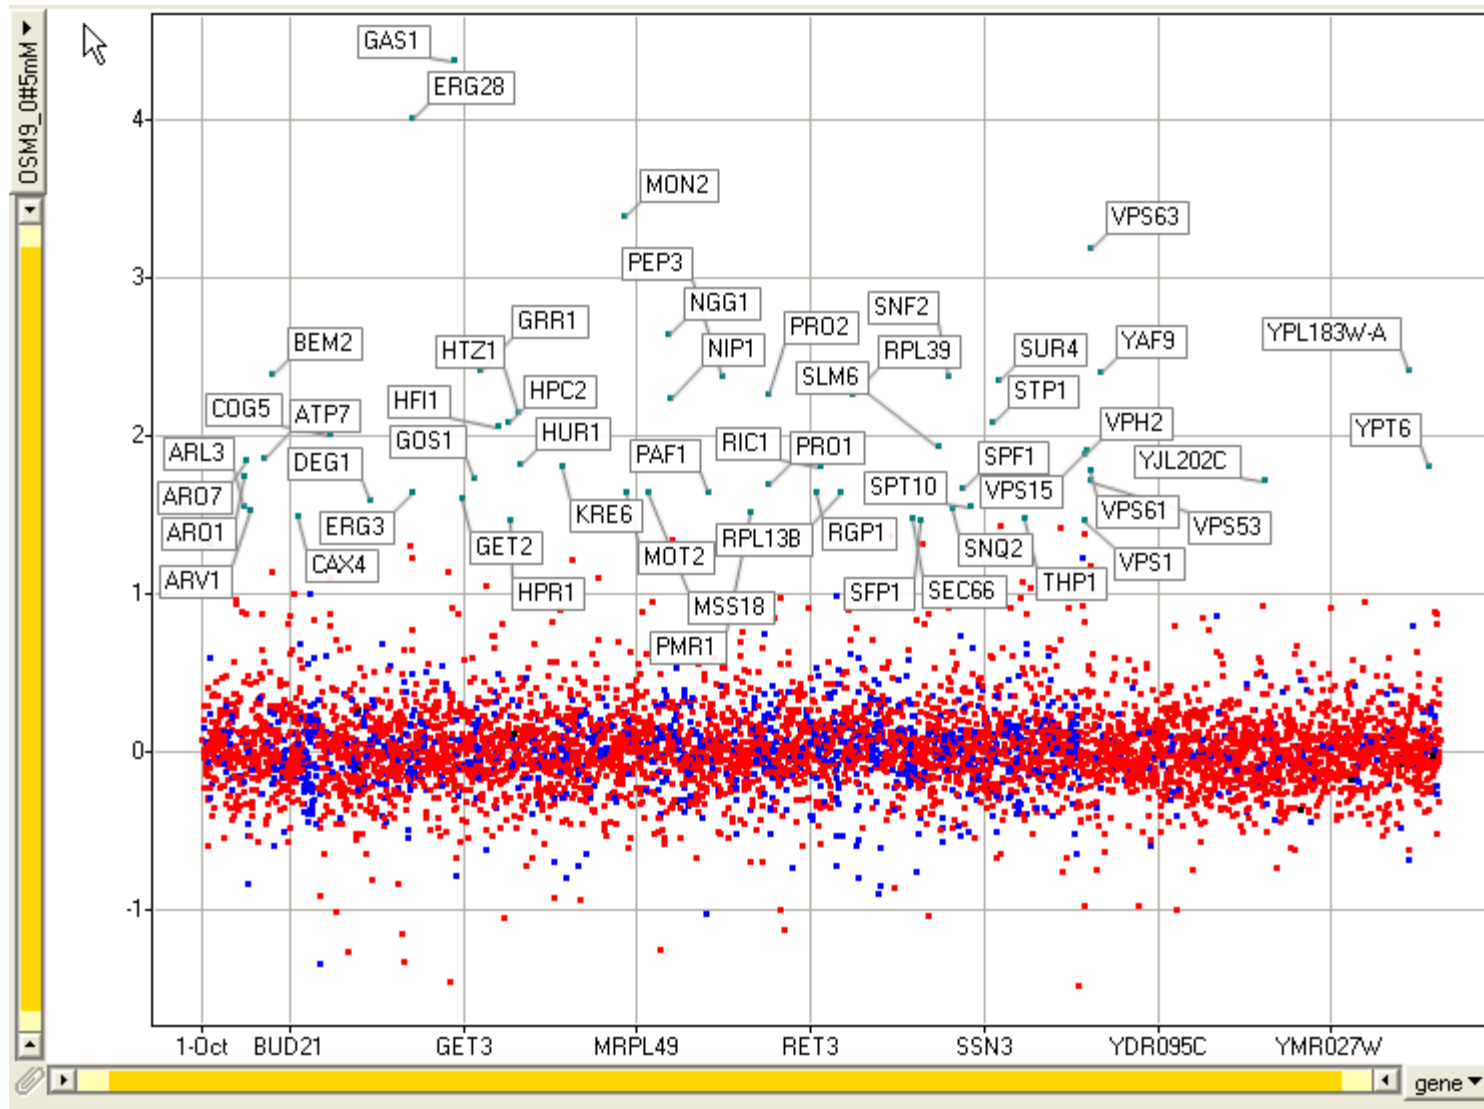

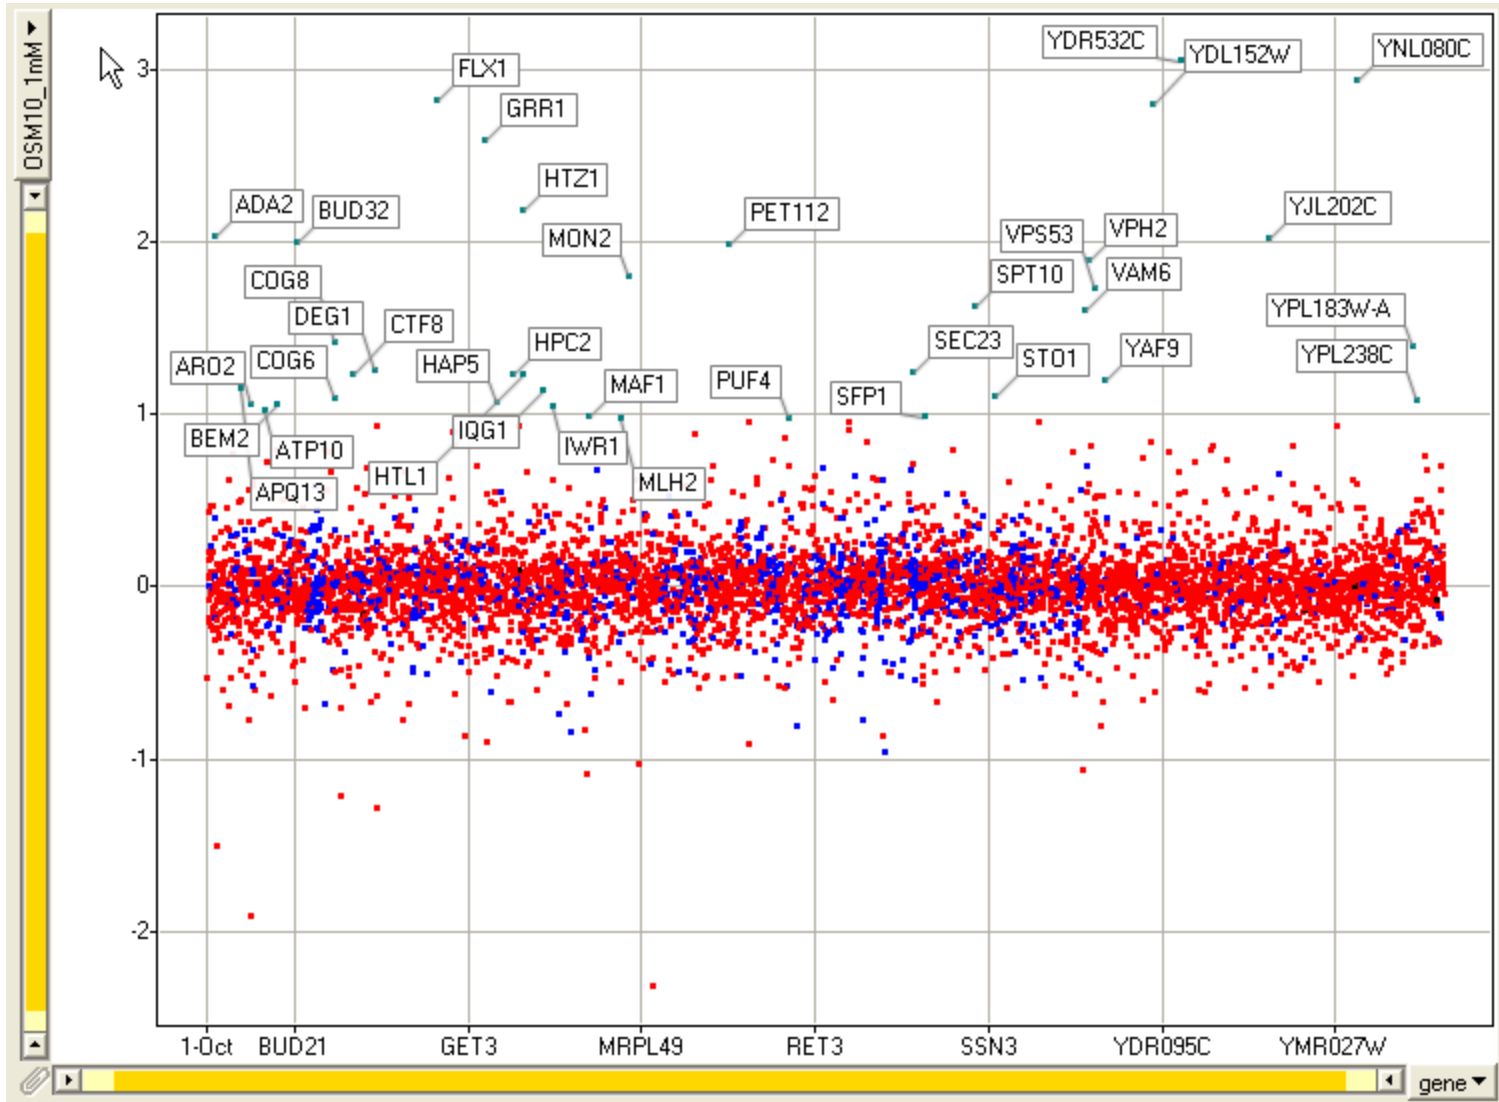

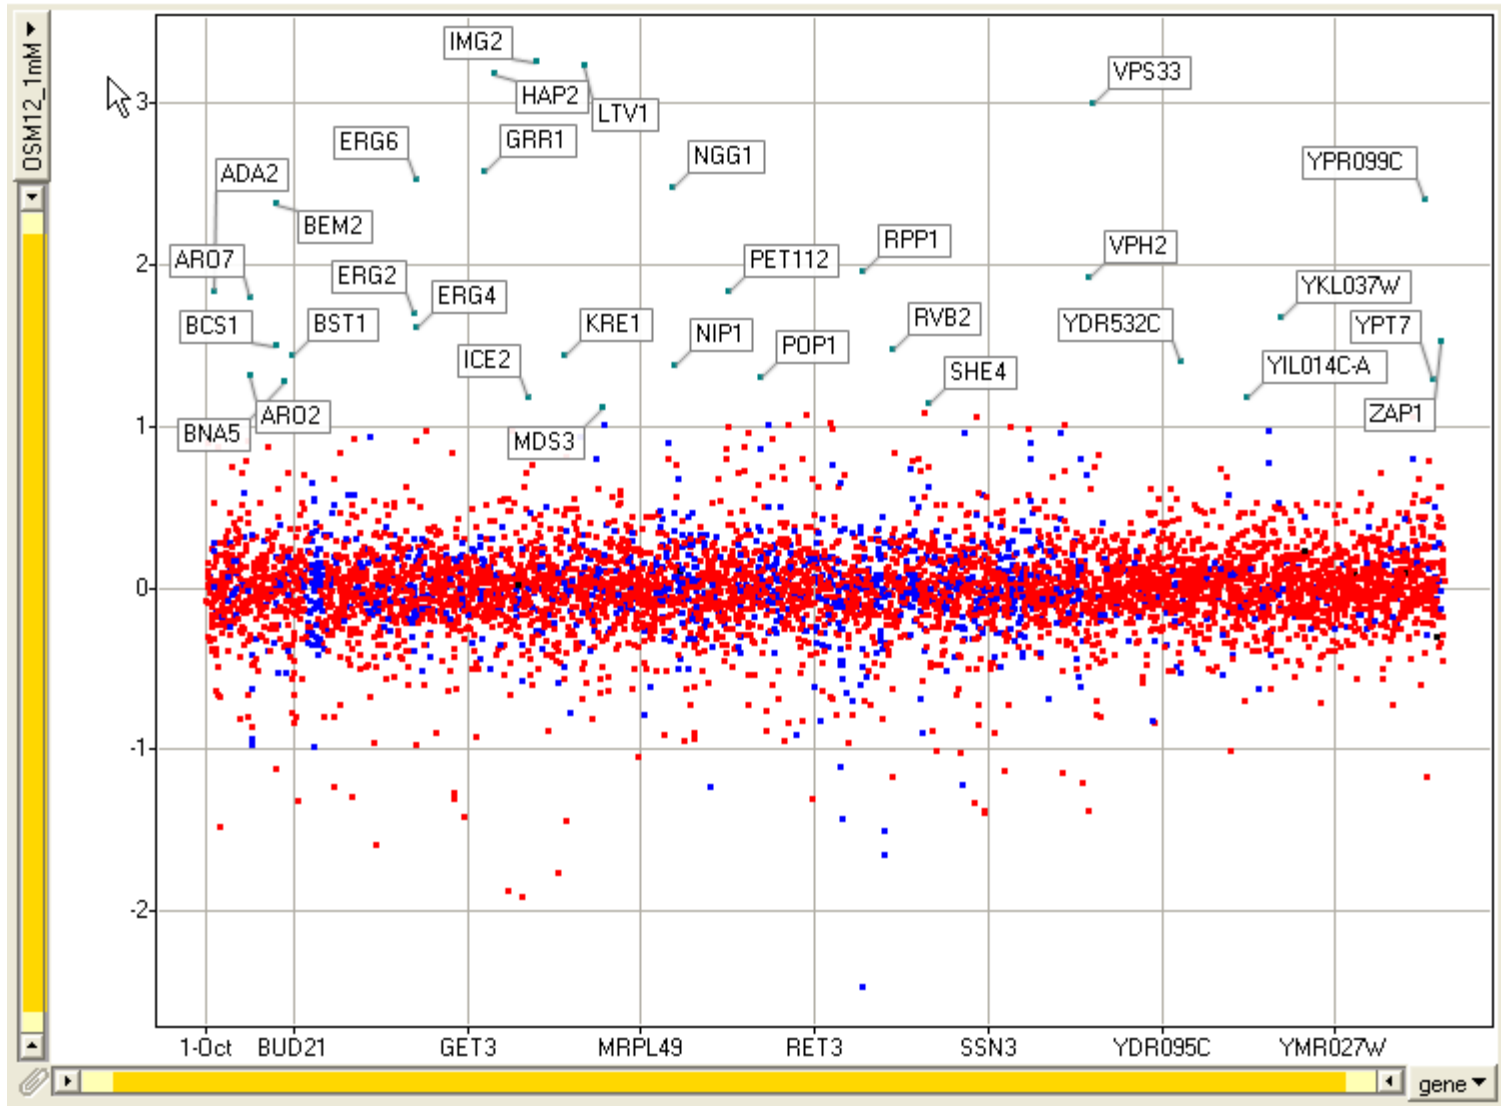

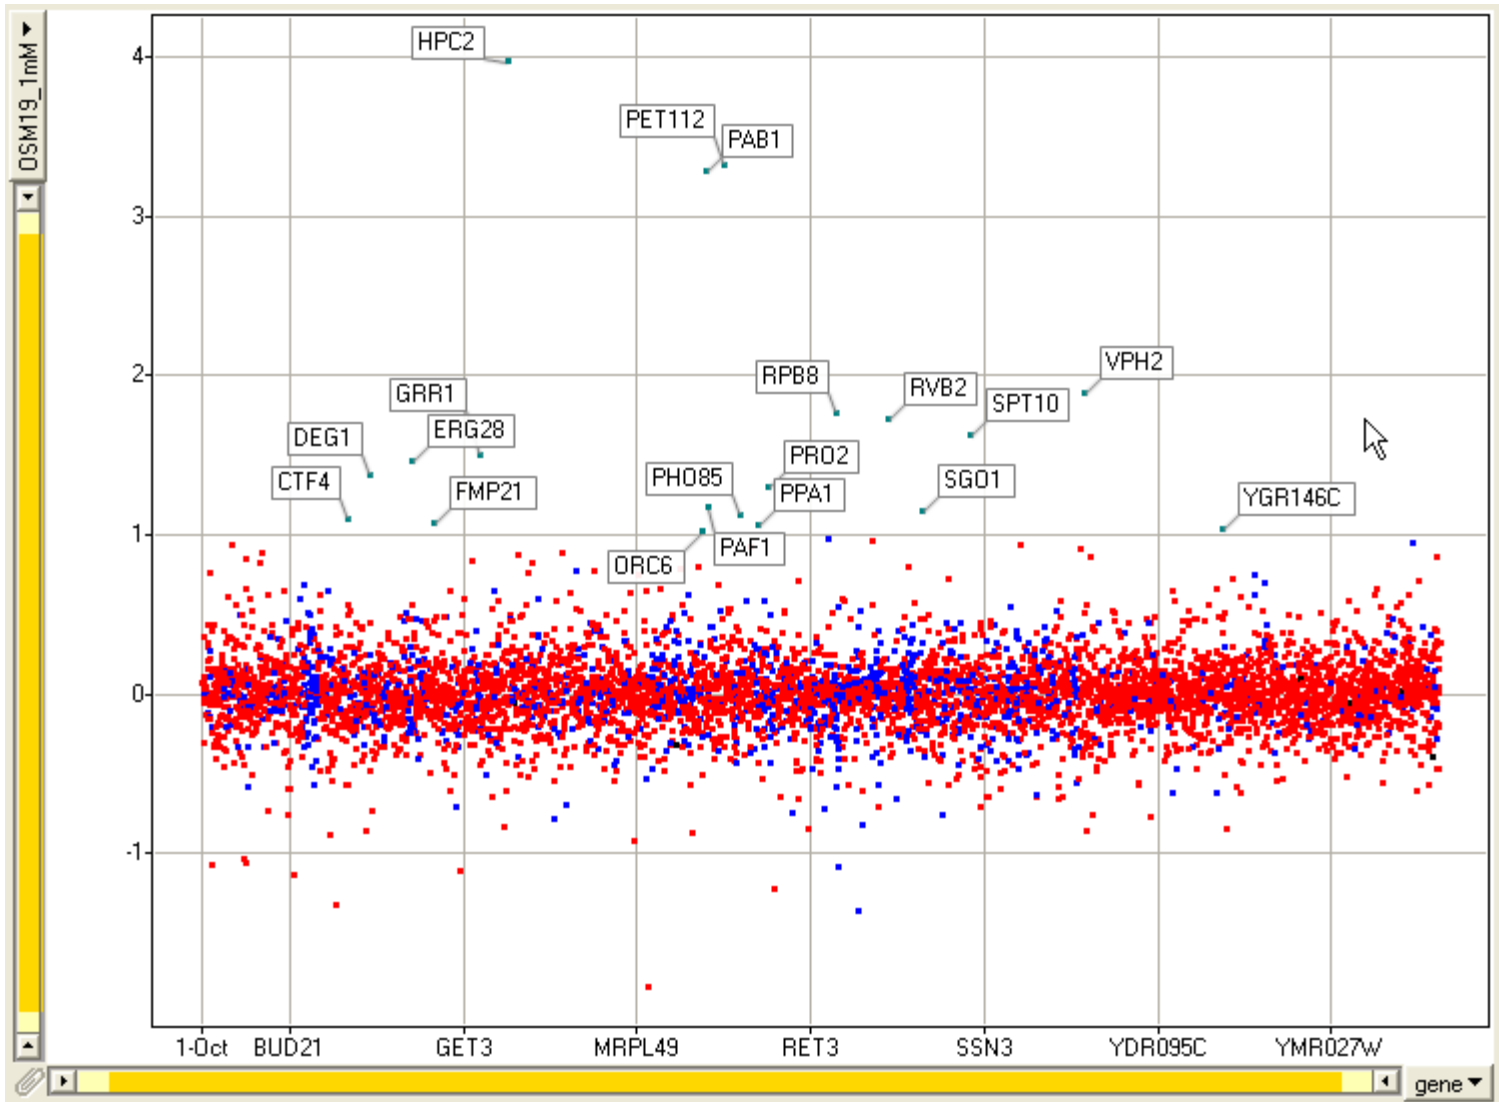

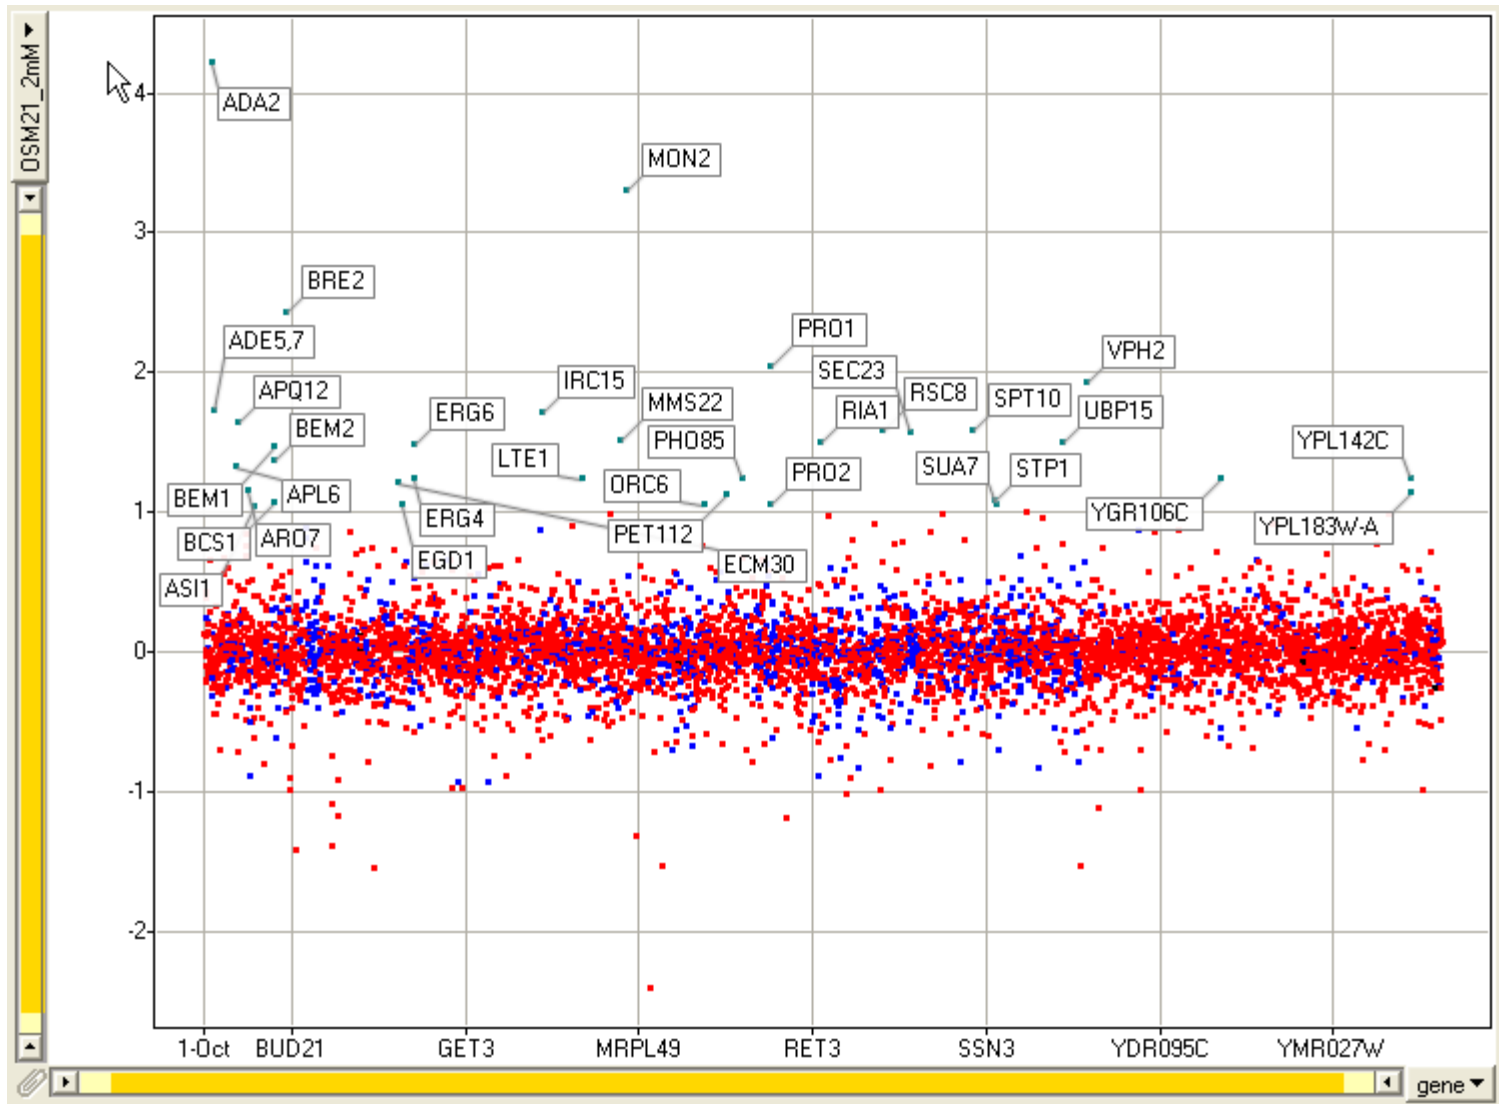

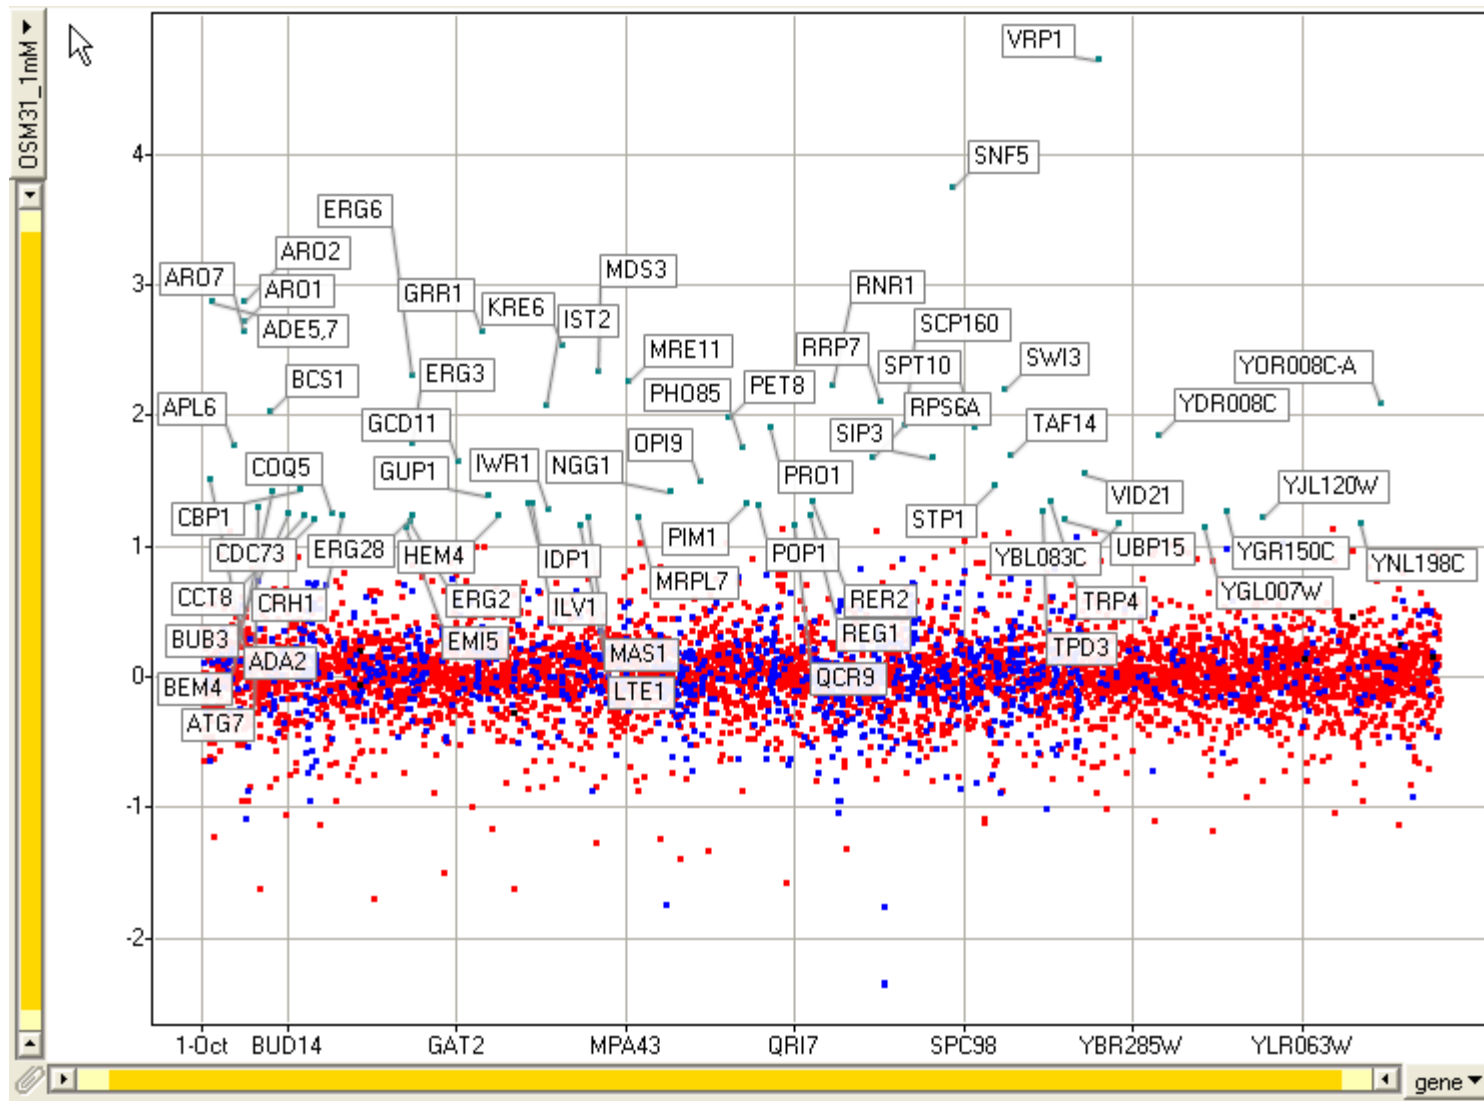



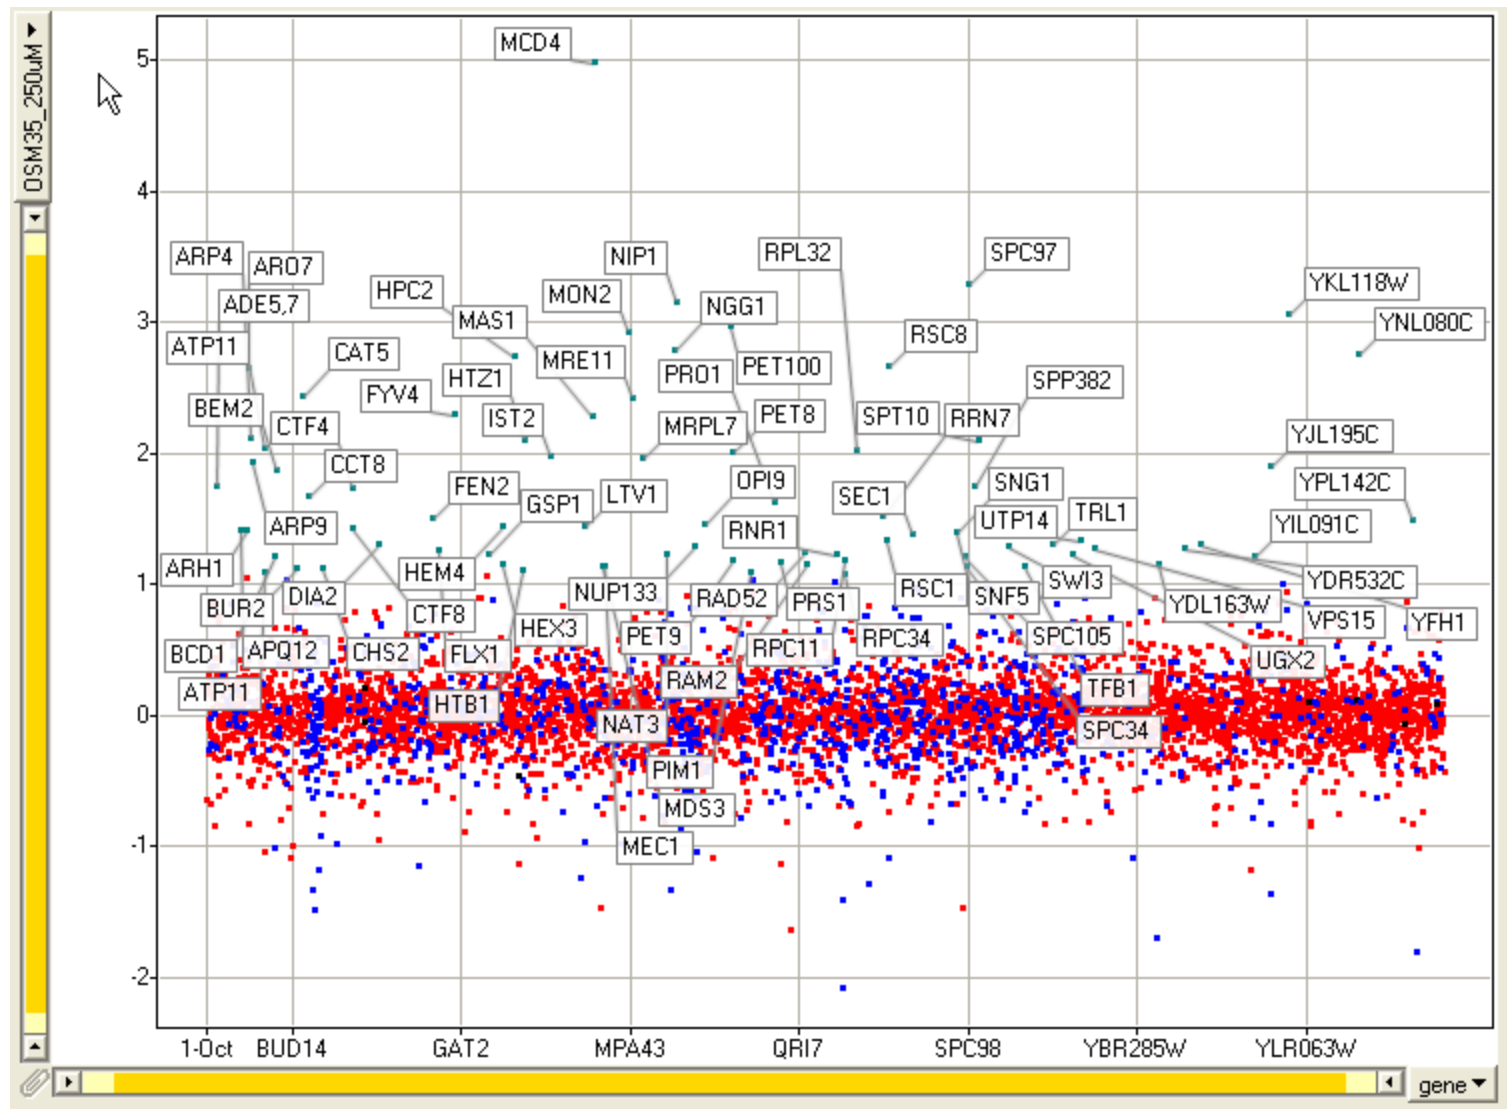

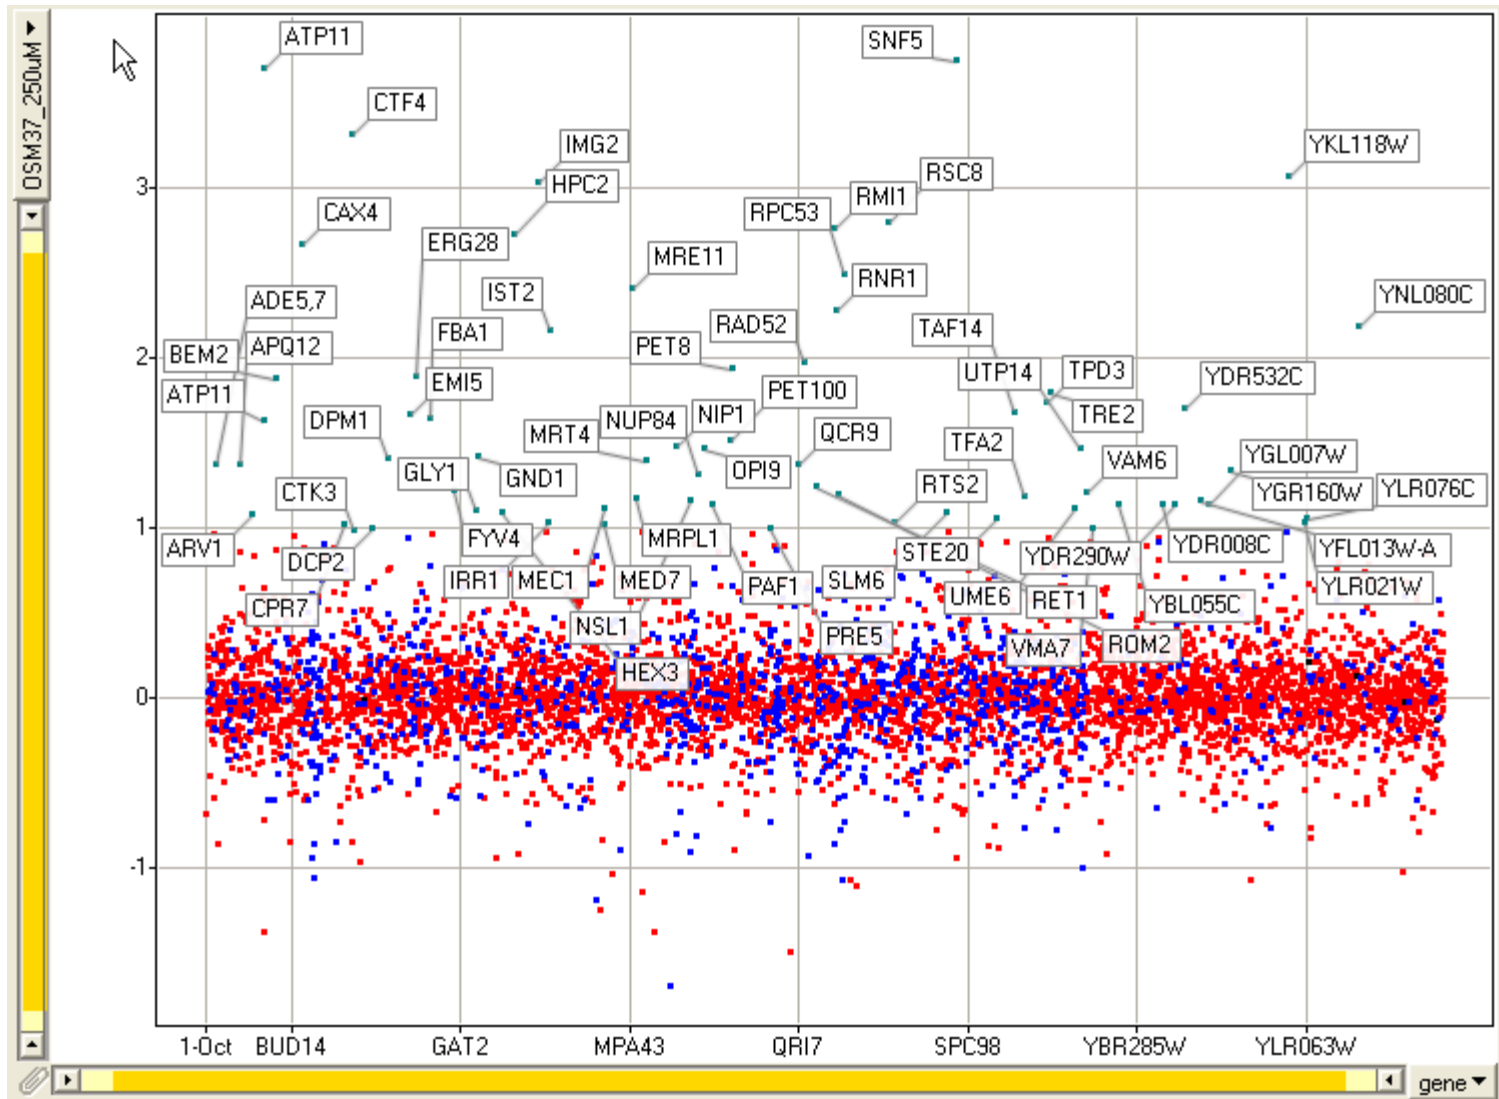

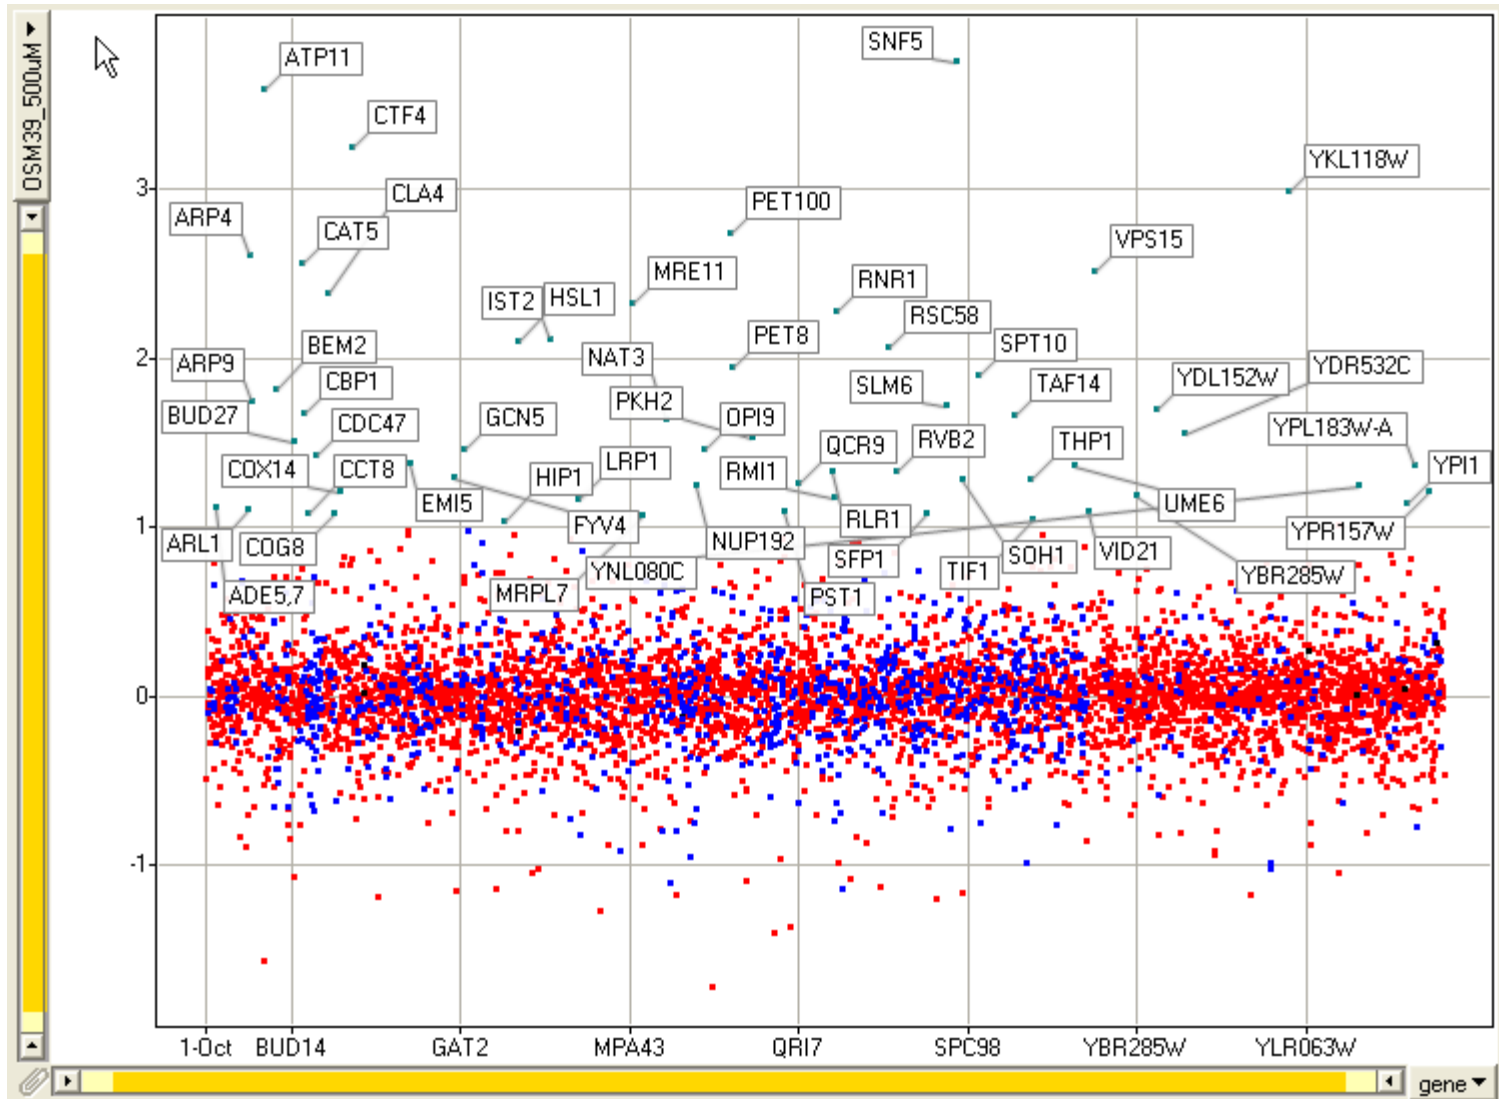

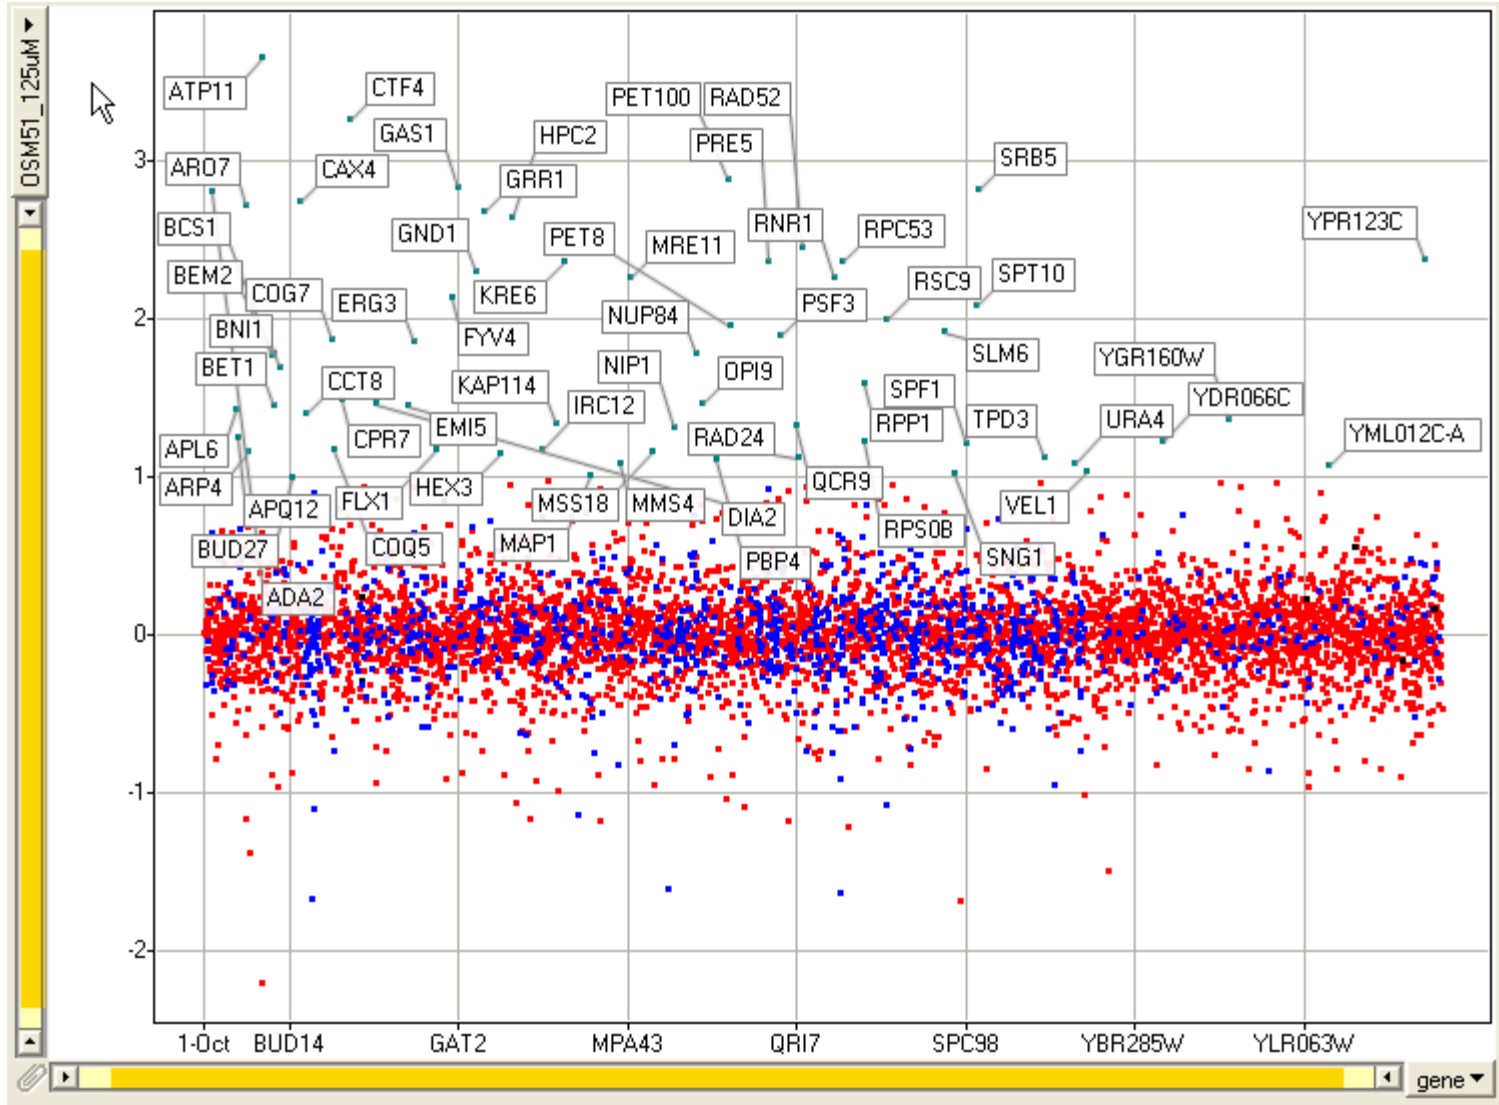

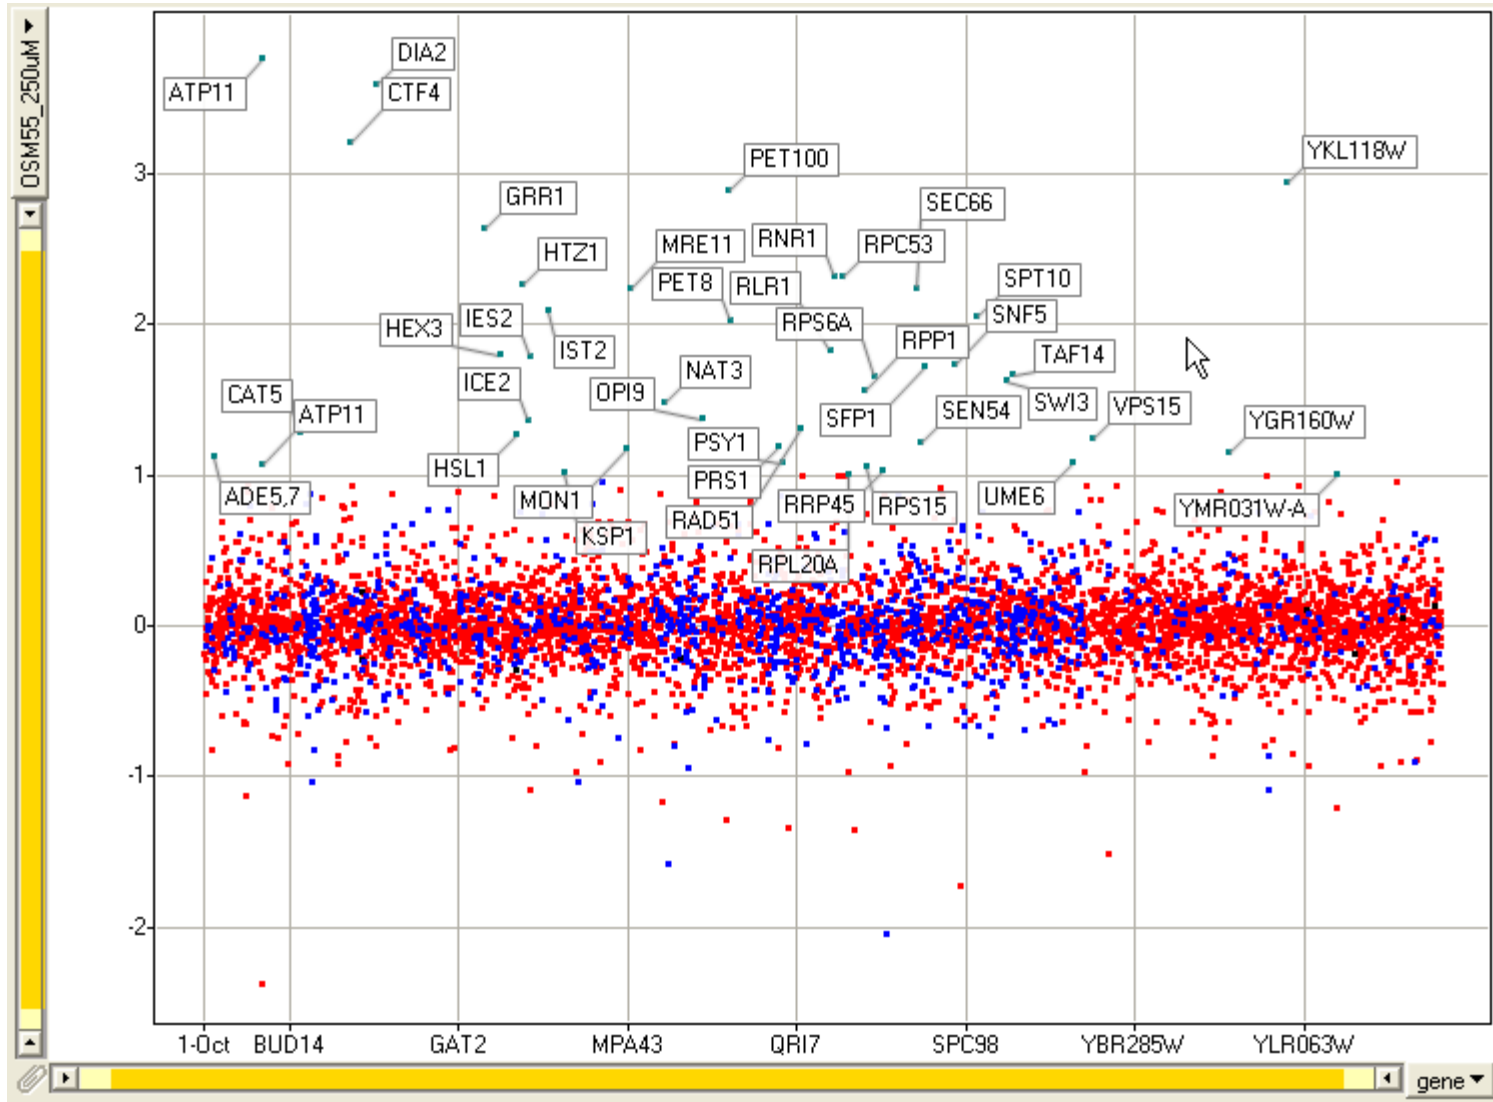

Supplement: oc6b00086_si_035.pdf [file oc6b00086_si_035.pdf]
